# Supplementary material for: In Vitro Human Metabolism and Inhibition Potency of Verbascoside for CYP Enzymes
Source: PubMed Central journal article supplement (PMC6600574; doi:10.3390/molecules24112191), 2019-06-11
Supplement: molecules-24-02191-s001.pdf [file molecules-24-02191-s001.pdf]

Supplementary Material

## *In vitro* human metabolism and inhibition potency of verbascoside for CYP enzymes

Anna-Mari Reid <sup>1</sup>, Risto Juvonen <sup>2</sup>, Pasi Huuskonen <sup>2</sup>, Marko Lehtonen <sup>3</sup>, Markku Pasanen <sup>2</sup> and Namrita Lall <sup>2, \*</sup>

<sup>1</sup> Department of Plant and Soil Sciences, University of Pretoria, Pretoria, South Africa; annamarikok@gmail.com

<sup>2</sup> School of Pharmacy, Faculty of Health Sciences, University of Eastern Finland, Kuopio, Finland; [risto.juvonen@uef.fi](mailto:risto.juvonen@uef.fi)

<sup>3</sup> LC-MS Metabolomics Center, Biocentre, Kuopio, Kuopio, Finland; marko.lehtonen@uef.fi.

\* Correspondence: [namrita.lall@up.ac.za](mailto:namrita.lall@up.ac.za)

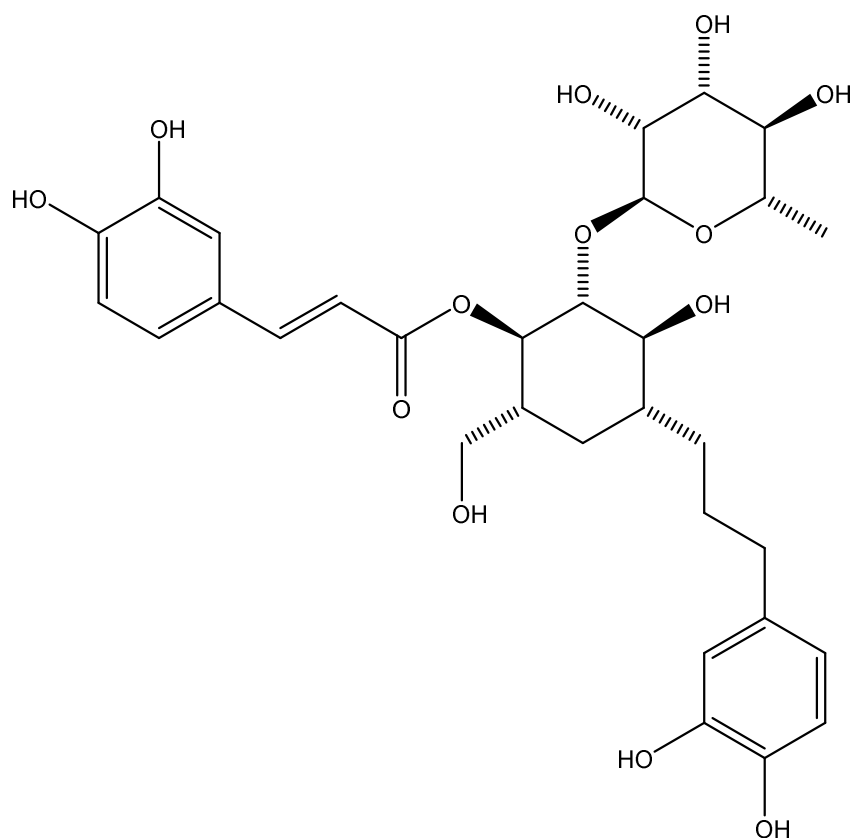

Fig 1S: Verbascoside structure

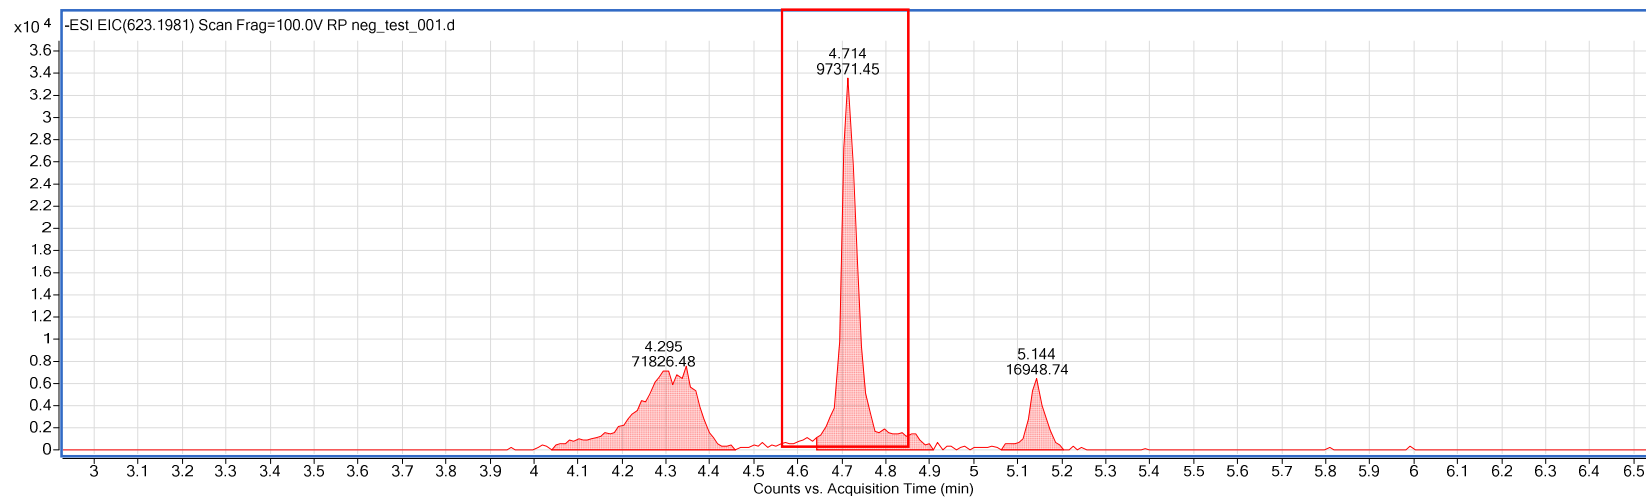

Fig 2S: The ESI EIC scan of verbascoside (Standard). The area of interest is circled in red (peak= 4.714)

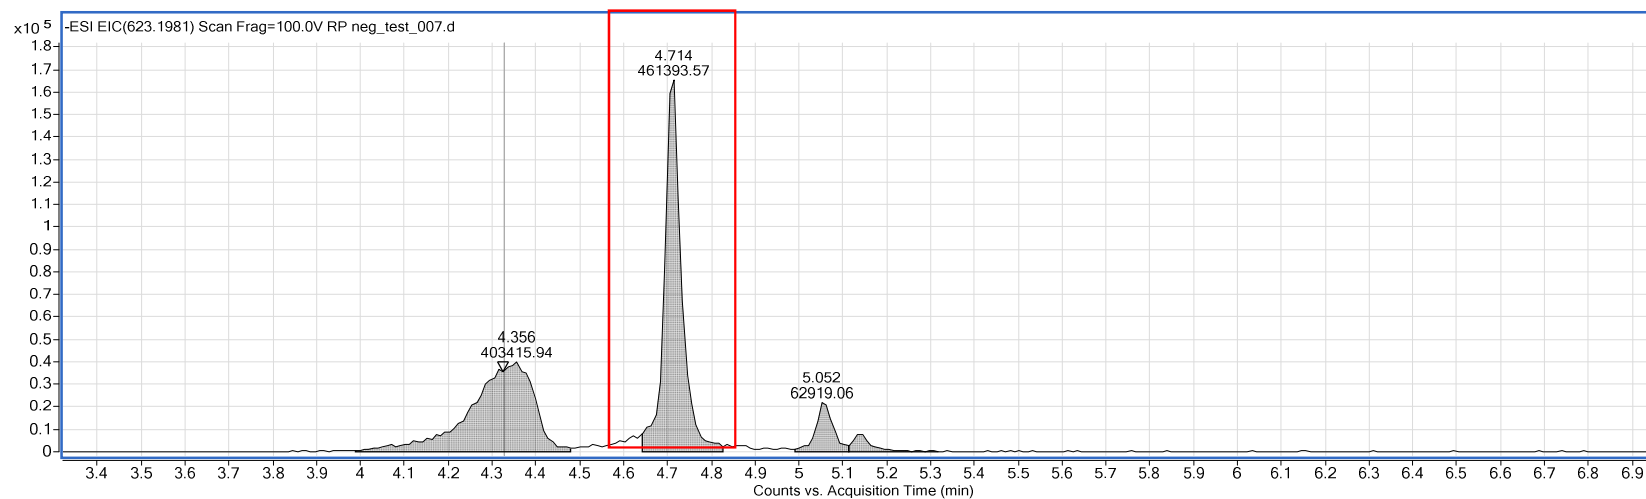

Fig 3S: The ESI EIC scan of the ethanolic extract of *Lippia scaberrima*, confirming the presence of verbascoside within the extract. The area of interest is circled in red (peak= 4.714)

### CYP1A2 (OCA349)

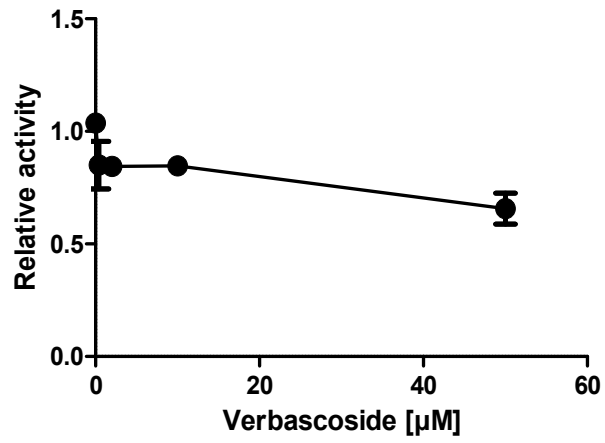

Fig 4S: The recombinant CYP 1A2 inhibition potential of verbascoside after incubation at various concentrations

### CYP1B1 (TFD008\_1)

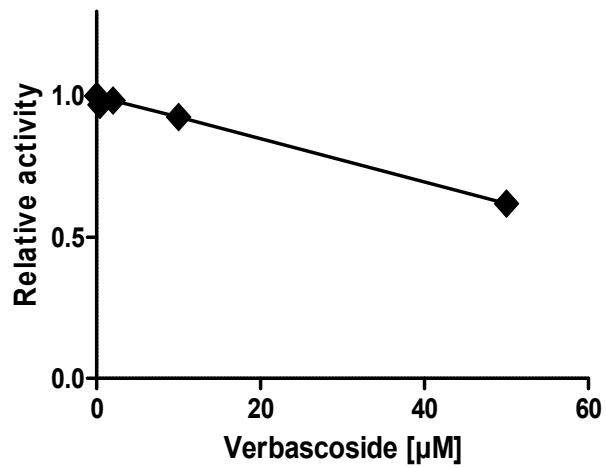

Fig 5S: The recombinant CYP 1B1 inhibition potential of verbascoside after incubation at various concentrations

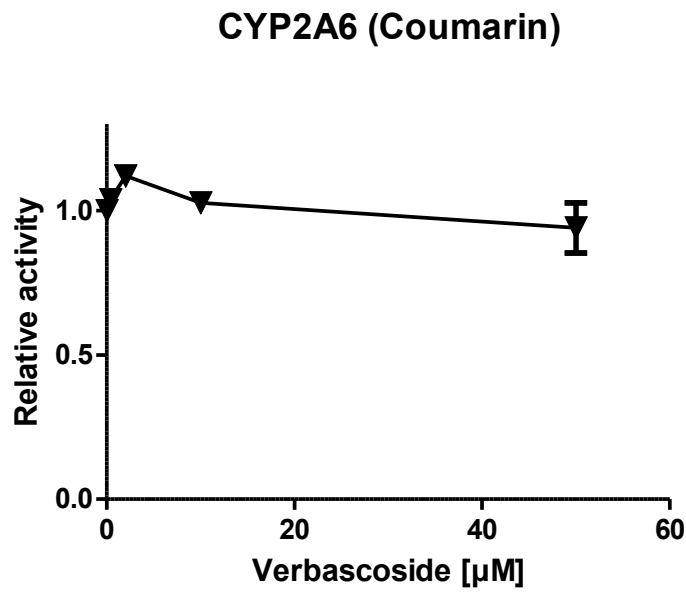

Fig 6S: The recombinant CYP 2A6 inhibition potential of verbascoside after incubation at various concentrations

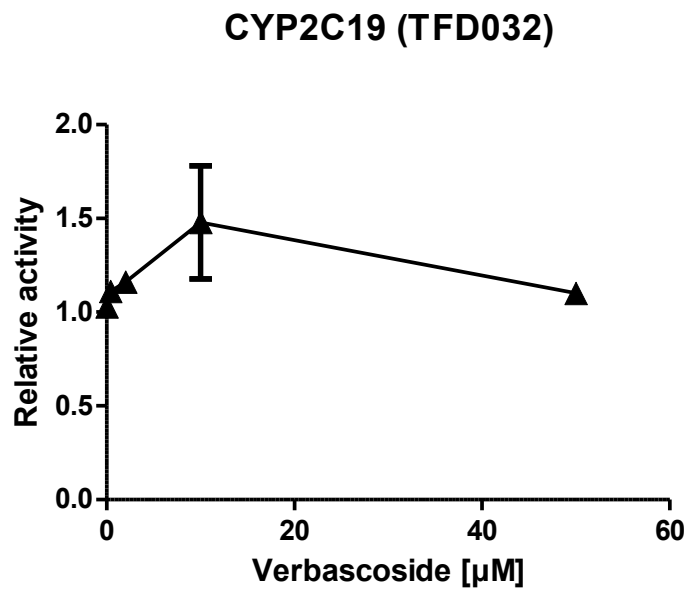

Fig 7S: The recombinant CYP 2C19 inhibition potential of verbascoside after incubation at various concentrations

### CYP2D6 (TFD023)

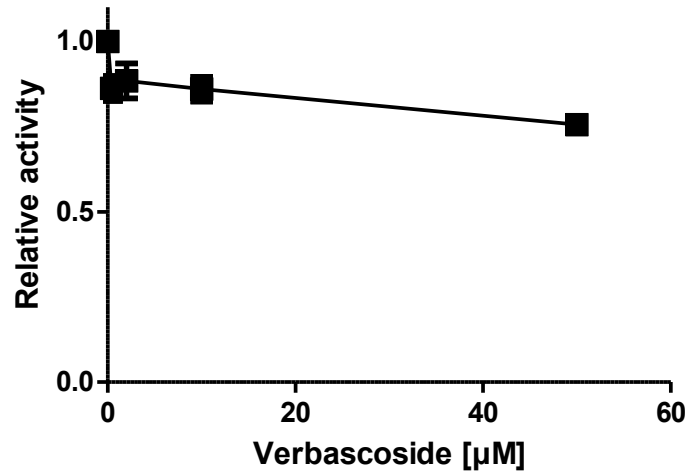

Fig 8S: The recombinant CYP 2D6 inhibition potential of verbascoside after incubation at various concentrations

### CYP3A4 (OCA369)

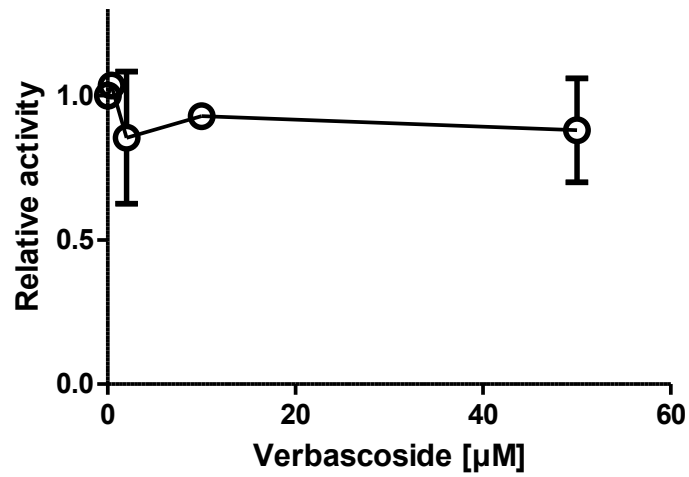

Fig 9S: The recombinant CYP 3A4 inhibition potential of verbascoside after incubation at various concentrations

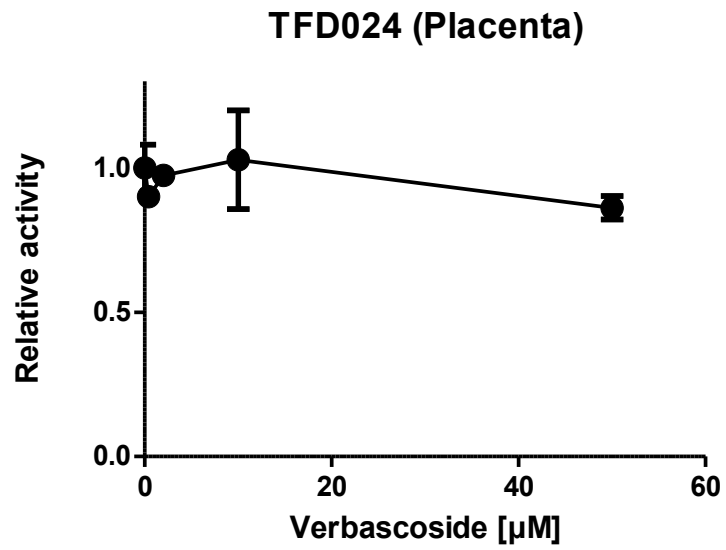

Fig 10S: The microsomal CYP1A1 inhibition potential of verbascoside after incubation at various concentrations

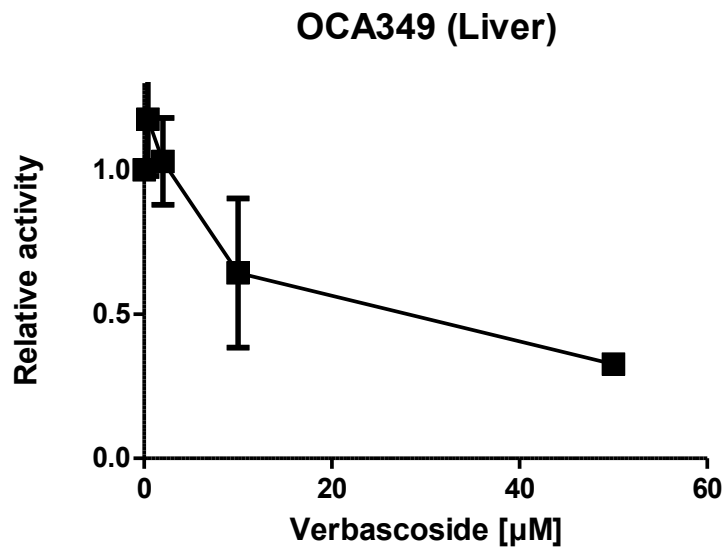

Fig 11S: The microsomal CYP1A2 inhibition potential of verbascoside after incubation at various concentrations

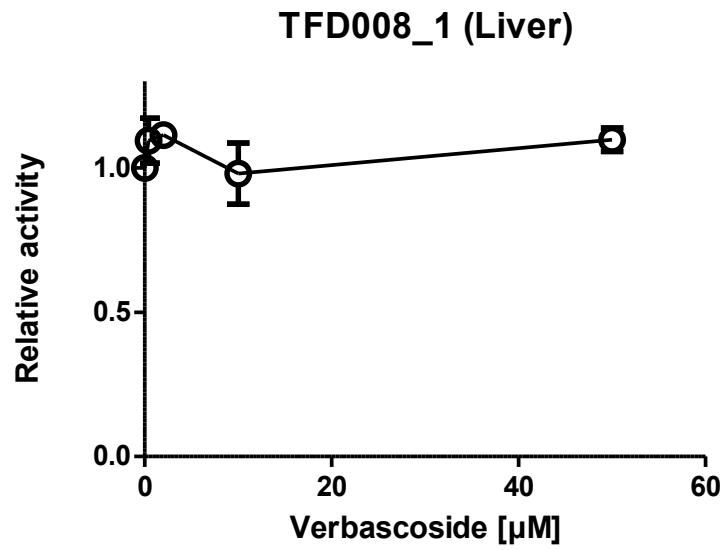

Fig 12S: The microsomal CYP1B1 inhibition potential of verbascoside after incubation at various concentrations

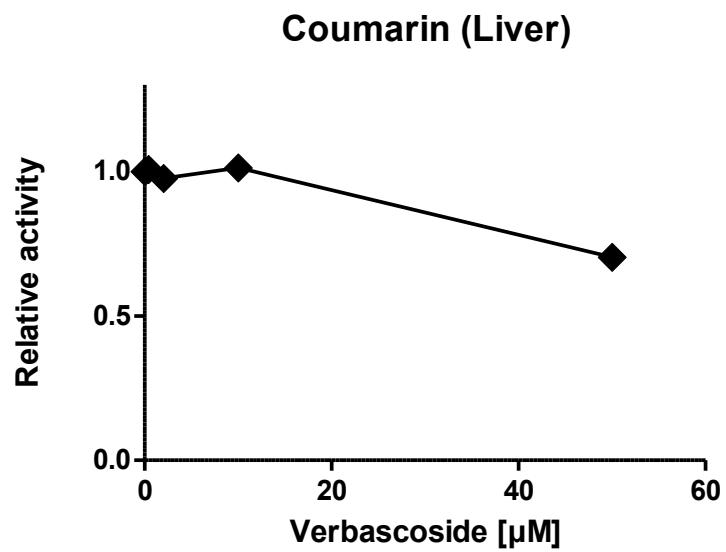

Fig 13S: The microsomal CYP2A6 inhibition potential of verbascoside after incubation at various concentrations

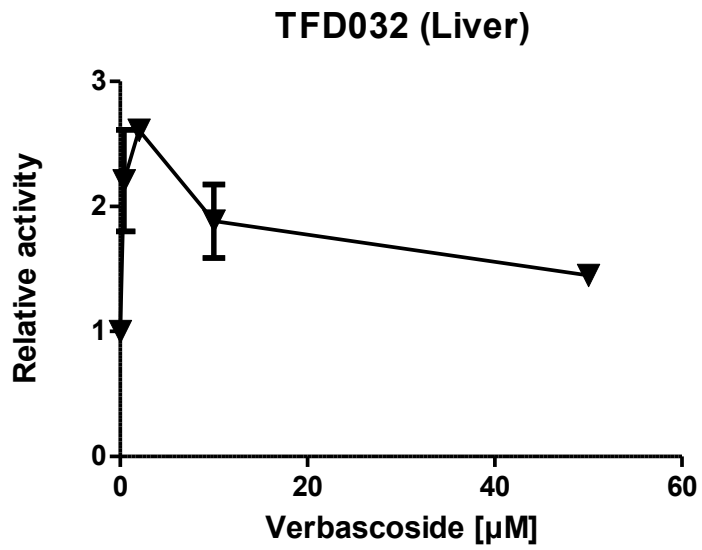

Fig 14S: The microsomal CYP2C19 inhibition potential of verbascoside after incubation at various concentrations

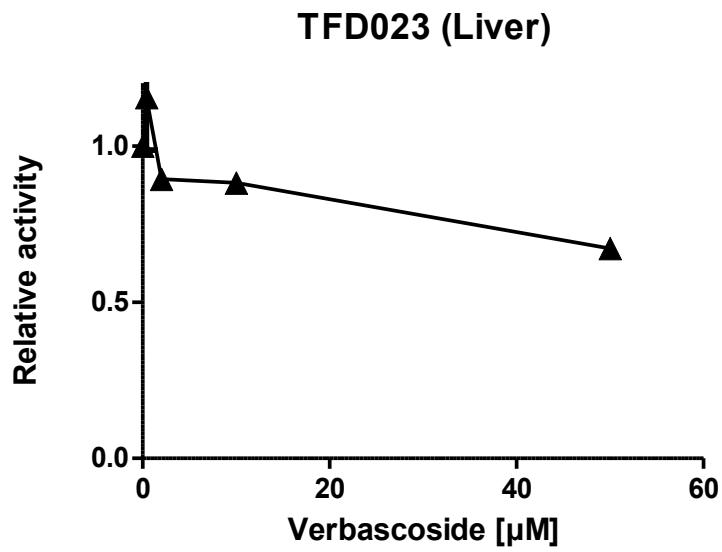

Fig 15S: The microsomal CYP2D6 inhibition potential of verbascoside after incubation at various concentrations



### OCA369 (Liver)

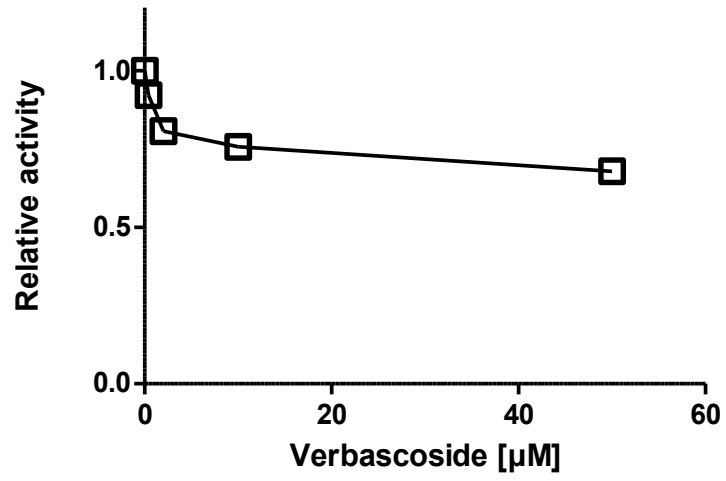

Fig 16S: The microsomal CYP3A4 inhibition potential of verbascoside after incubation at various concentrations
